# Supplementary material for: Predicting Autism Spectrum Disorder Using Blood-based Gene Expression Signatures and Machine Learning
Source: PubMed Central journal article supplement — Clin Psychopharmacol Neurosci. 2017 Feb 28;15(1):47–52. doi: 10.9758/cpn.2017.15.1.47 (PMC5290715; doi:10.9758/cpn.2017.15.1.47), 2017-02-28
Supplement: cpn-15-047_suppl.1.pdf [file cpn-15-047_suppl.1.pdf]

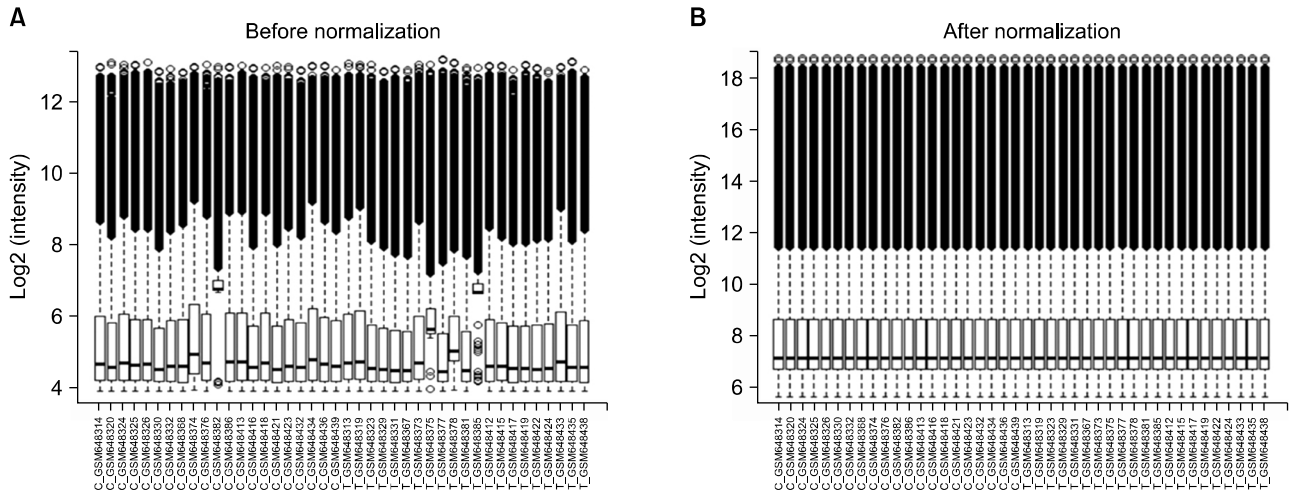

**Supplementary Fig. 1.** Box plots of expression data before and after normalization. The black line in each box represents the median of each set of data, which determines the degree of standardization of data through its distribution. The medians (black lines) are approximately the same, indicating good performance of normalization (B) compared to raw data (A).
