# Supplementary material for: Predicting Autism Spectrum Disorder Using Blood-based Gene Expression Signatures and Machine Learning
Source: PubMed Central journal article supplement — Clin Psychopharmacol Neurosci. 2017 Feb 28;15(1):47–52. doi: 10.9758/cpn.2017.15.1.47 (PMC5290715; doi:10.9758/cpn.2017.15.1.47), 2017-02-28
Supplement: cpn-15-047_suppl.2.pdf [file cpn-15-047_suppl.2.pdf]

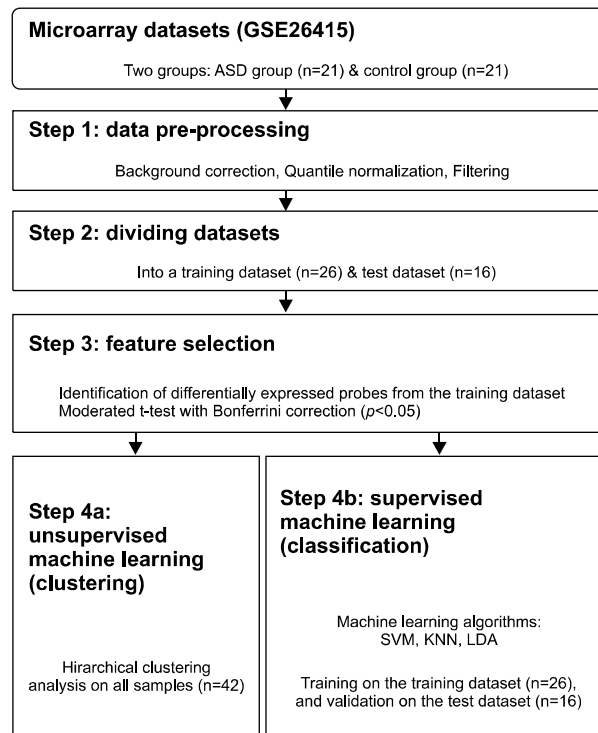

**Supplementary Fig. 2.** Diagram of the study design. ASD, autism spectrum disorder; SVM, support vector machine; KNN, K-nearest neighbor; LDA, linear discriminant analysis.
