# Supplementary material for: Predicting Autism Spectrum Disorder Using Blood-based Gene Expression Signatures and Machine Learning
Source: PubMed Central journal article supplement — Clin Psychopharmacol Neurosci. 2017 Feb 28;15(1):47–52. doi: 10.9758/cpn.2017.15.1.47 (PMC5290715; doi:10.9758/cpn.2017.15.1.47), 2017-02-28
Supplement: cpn-15-047_suppl.3.pdf [file cpn-15-047_suppl.3.pdf]

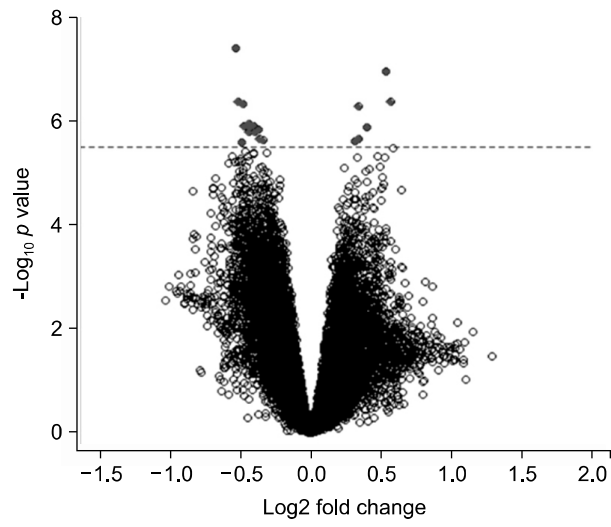

**Supplementary Fig. 3.** Volcano plot for differential gene expression profiles between autism spectrum disorders (ASDs) and controls. The blue line represents p value at family wise error rate of 0.05 ( $-\log_{10}p=5.5$ ). The red dots represent probes significantly differentially expressed between subjects with ASD (n=13) and controls (n=13) from the training set.
