# Supplementary material for: Predicting Autism Spectrum Disorder Using Blood-based Gene Expression Signatures and Machine Learning
Source: PubMed Central journal article supplement — Clin Psychopharmacol Neurosci. 2017 Feb 28;15(1):47–52. doi: 10.9758/cpn.2017.15.1.47 (PMC5290715; doi:10.9758/cpn.2017.15.1.47), 2017-02-28
Supplement: cpn-15-047_suppl.4.pdf [file cpn-15-047_suppl.4.pdf]

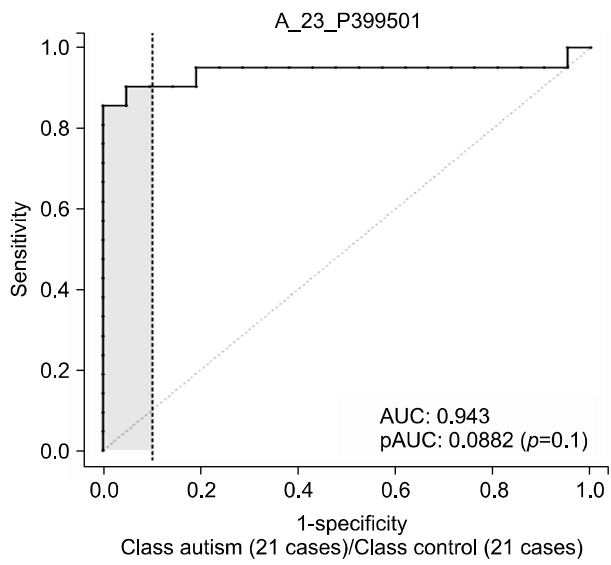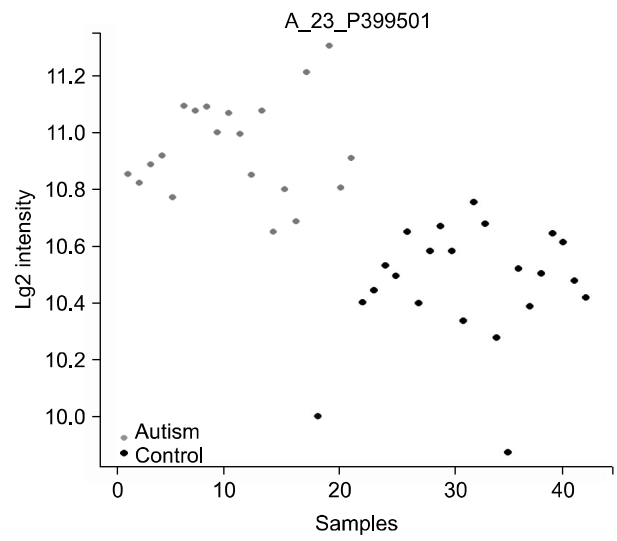

**Supplementary Fig. 4.** A receiver operating characteristic (ROC) curve of a probe set (A-23-P399501) that separates well between the ASD group (red dot) and the control group (blue dot). AUC, area under the ROC curve.
